# Supplementary material for: A Better Disinfectant for Low-Resourced Hospitals? A Multi-Period Cluster Randomised Trial Comparing Hypochlorous Acid with Sodium Hypochlorite in Nigerian Hospitals: The EWASH Trial
Source: MDPI journal article supplement (doi:10.3390/microorganisms10050910), 2022-04-26
Supplement: s1 [file s1]

## Supplementary Table S1

**Table S1.** Distribution of clean samples by cluster and week.

| Cluster | Week | Percentage | N of Clean* Samples | N <sub>tot</sub> |
|---------|------|------------|---------------------|------------------|
| 1       | 1    | 0.8608     | 68                  | 79               |
| 1       | 2    | 0.8810     | 74                  | 84               |
| 1       | 3    | 0.9405     | 79                  | 84               |
| 1       | 4    | 0.9524     | 80                  | 84               |
| 1       | 5    | 0.9881     | 83                  | 84               |
| 1       | 6    | 0.9286     | 78                  | 84               |
| 2       | 1    | 0.8429     | 59                  | 70               |
| 2       | 2    | 0.9405     | 79                  | 84               |
| 2       | 3    | 0.8929     | 75                  | 84               |
| 2       | 4    | 0.8929     | 75                  | 84               |
| 2       | 5    | 0.9405     | 79                  | 84               |
| 2       | 6    | 0.9643     | 81                  | 84               |
| 3       | 1    | 0.8590     | 67                  | 78               |
| 3       | 2    | 0.8929     | 75                  | 84               |
| 3       | 3    | 0.8929     | 75                  | 84               |
| 3       | 4    | 0.8571     | 72                  | 84               |
| 3       | 5    | 0.9881     | 83                  | 84               |
| 3       | 6    | 0.8929     | 75                  | 84               |
| 4       | 1    | 0.7250     | 58                  | 80               |
| 4       | 2    | 0.8452     | 71                  | 84               |
| 4       | 3    | 0.8333     | 70                  | 84               |
| 4       | 4    | 0.8452     | 71                  | 84               |
| 4       | 5    | 0.8333     | 70                  | 84               |
| 4       | 6    | 0.8214     | 69                  | 84               |
| 5       | 1    | 0.7531     | 61                  | 81               |
| 5       | 2    | 0.7262     | 61                  | 84               |
| 5       | 3    | 0.8810     | 74                  | 84               |
| 5       | 4    | 0.8929     | 75                  | 84               |
| 5       | 5    | 0.8690     | 73                  | 84               |
| 5       | 6    | 0.9405     | 79                  | 84               |
| 6       | 1    | 0.6538     | 51                  | 78               |
| 6       | 2    | 0.7179     | 56                  | 78               |
| 6       | 3    | 0.9487     | 74                  | 78               |
| 6       | 4    | 0.8205     | 64                  | 78               |
| 6       | 5    | 0.8205     | 64                  | 78               |
| 6       | 6    | 0.8846     | 69                  | 78               |

\*clean defined as (<2.5 CFU/cm<sup>2</sup>)
